# Supplementary material
Source: PubMed Central journal article supplement (PMC4180659)
Supplement: NIHMS629974-supplement-Box_1.pdf [file NIHMS629974-supplement-Box_1.pdf]

## **Box 1**

Types of disease course in sJIA

### **Monocyclic course**

Single episode of active disease, followed by inactive disease\*

### **Polycyclic course**

Active disease alternating with periods of inactive disease

### **Persistent course**

Persistently active disease\*

\*Period of follow-up varies between studies. Abbreviation: sJIA, systemic juvenile idiopathic arthritis.
