# Supplementary material
Source: PubMed Central journal article supplement (PMC4180659)
Supplement: NIHMS629974-supplement-Learning_Objectives.pdf [file NIHMS629974-supplement-Learning_Objectives.pdf]

## **Learning Objectives**

Upon completion of this activity, participants should be able to:

1. Analyze the clinical picture of sJIA.
2. Describe the basic pathophysiology of sJIA.
3. Distinguish the proinflammatory cytokine most associated with early sJIA.

Evaluate immunologic factors associated with sJIA.
